# Supplementary material for: Nanoencapsulation Boosts the Copper-Induced Defense Responses of a Susceptible Coffea arabica Cultivar against Hemileia vastatrix
Source: MDPI journal article supplement (doi:10.3390/antibiotics12020249), 2023-01-26
Supplement: s1 [file s1]

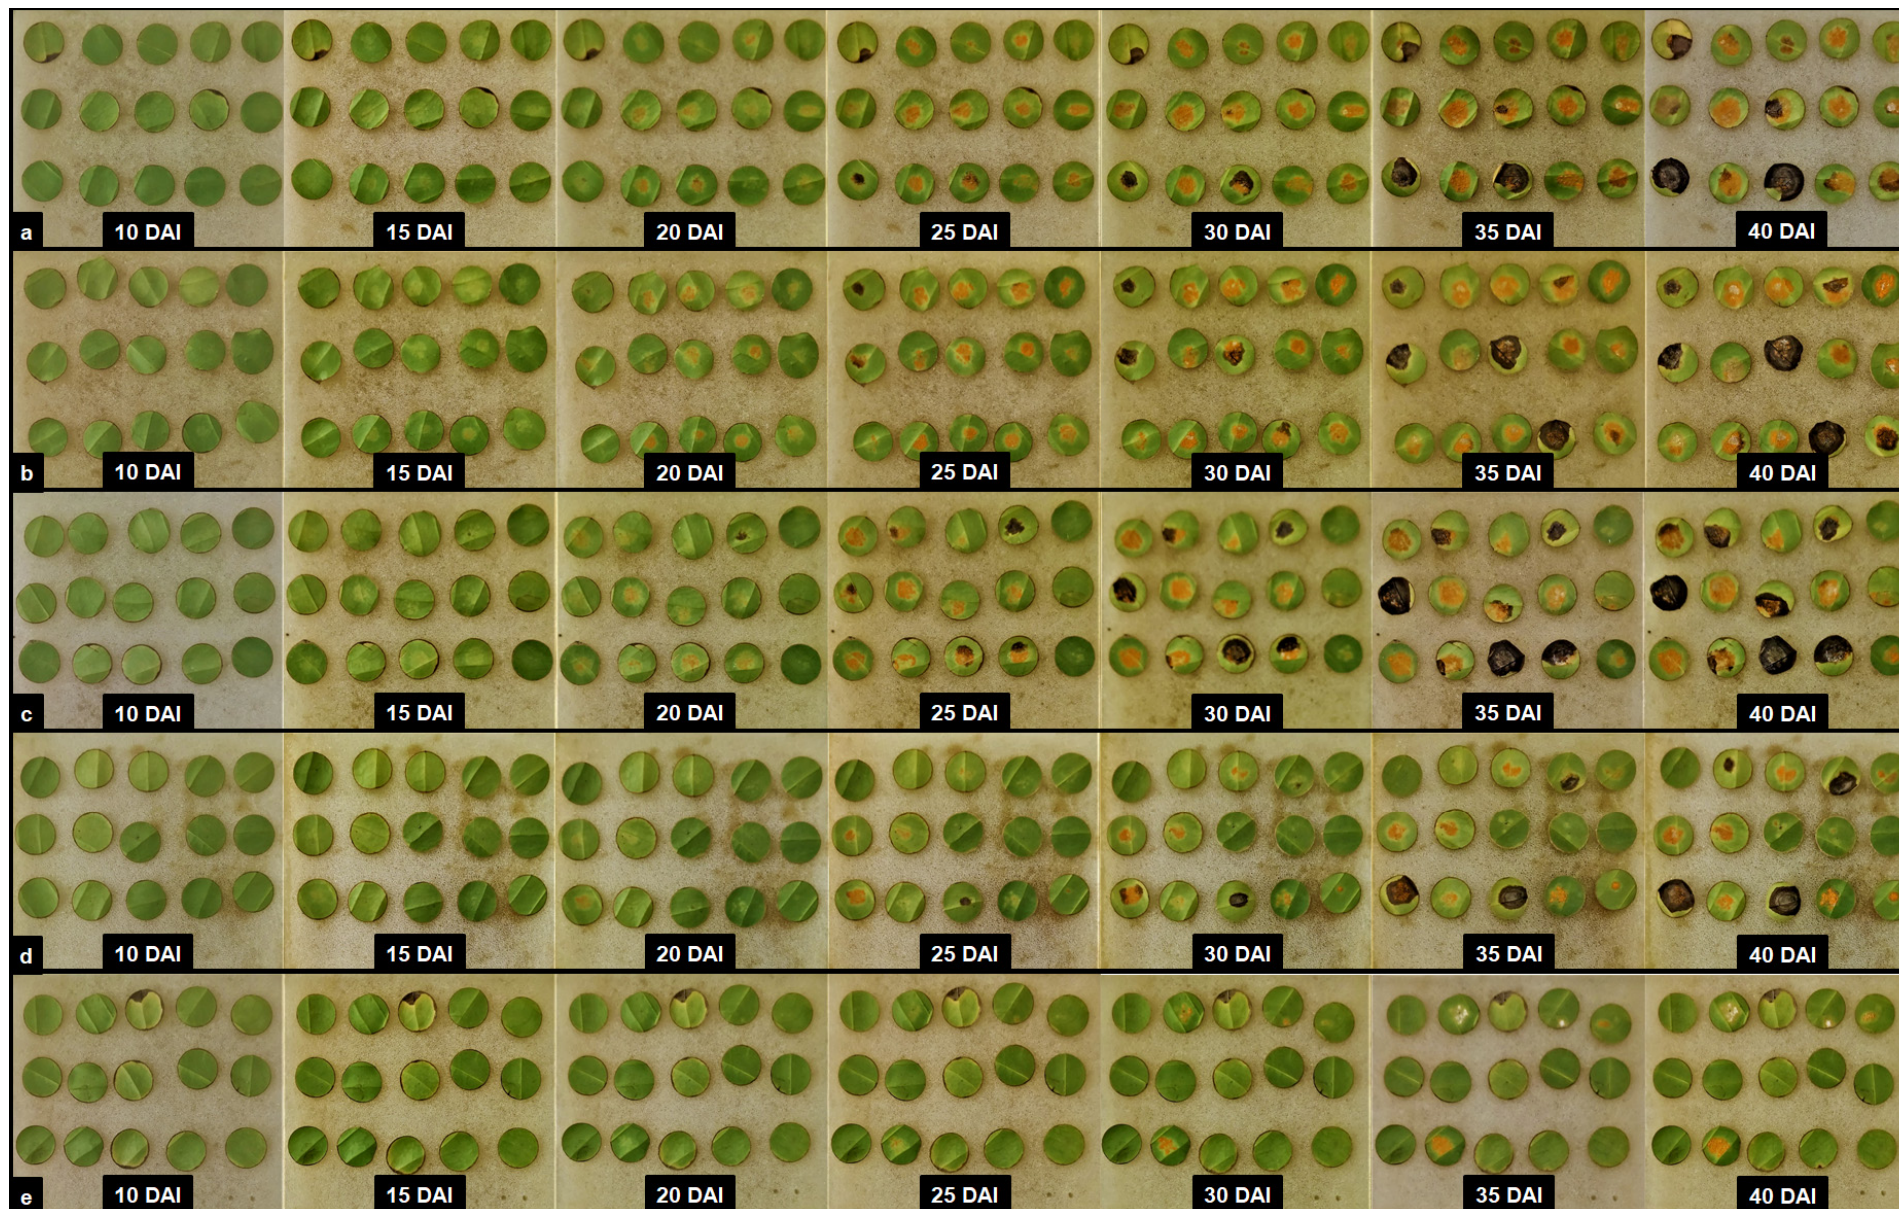

**Figure S1.** Representative images of *Hemileia vastatrix* disease progression in *Coffea arabica* cv. IPR 100 leaf discs at 10, 15, 20, 25, 30, 35, and 40 days after infection (DAI). The discs were treated with distilled water as a control (CONT) (a), chitosan/sodium tripolyphosphate nanoparticles without  $\text{Cu}^{2+}$  ions ( $\text{NP } 0.25 \text{ g L}^{-1}$ ) (b), ( $\text{NP } 0.5 \text{ g L}^{-1}$ ) (c), ( $\text{NP } 1 \text{ g L}^{-1}$ ) (d), and chitosan/sodium tripolyphosphate nanoparticles containing  $\text{Cu}^{2+}$  ions ( $\text{NPCu } 1.25 \text{ mmol L}^{-1}$ ) (e).



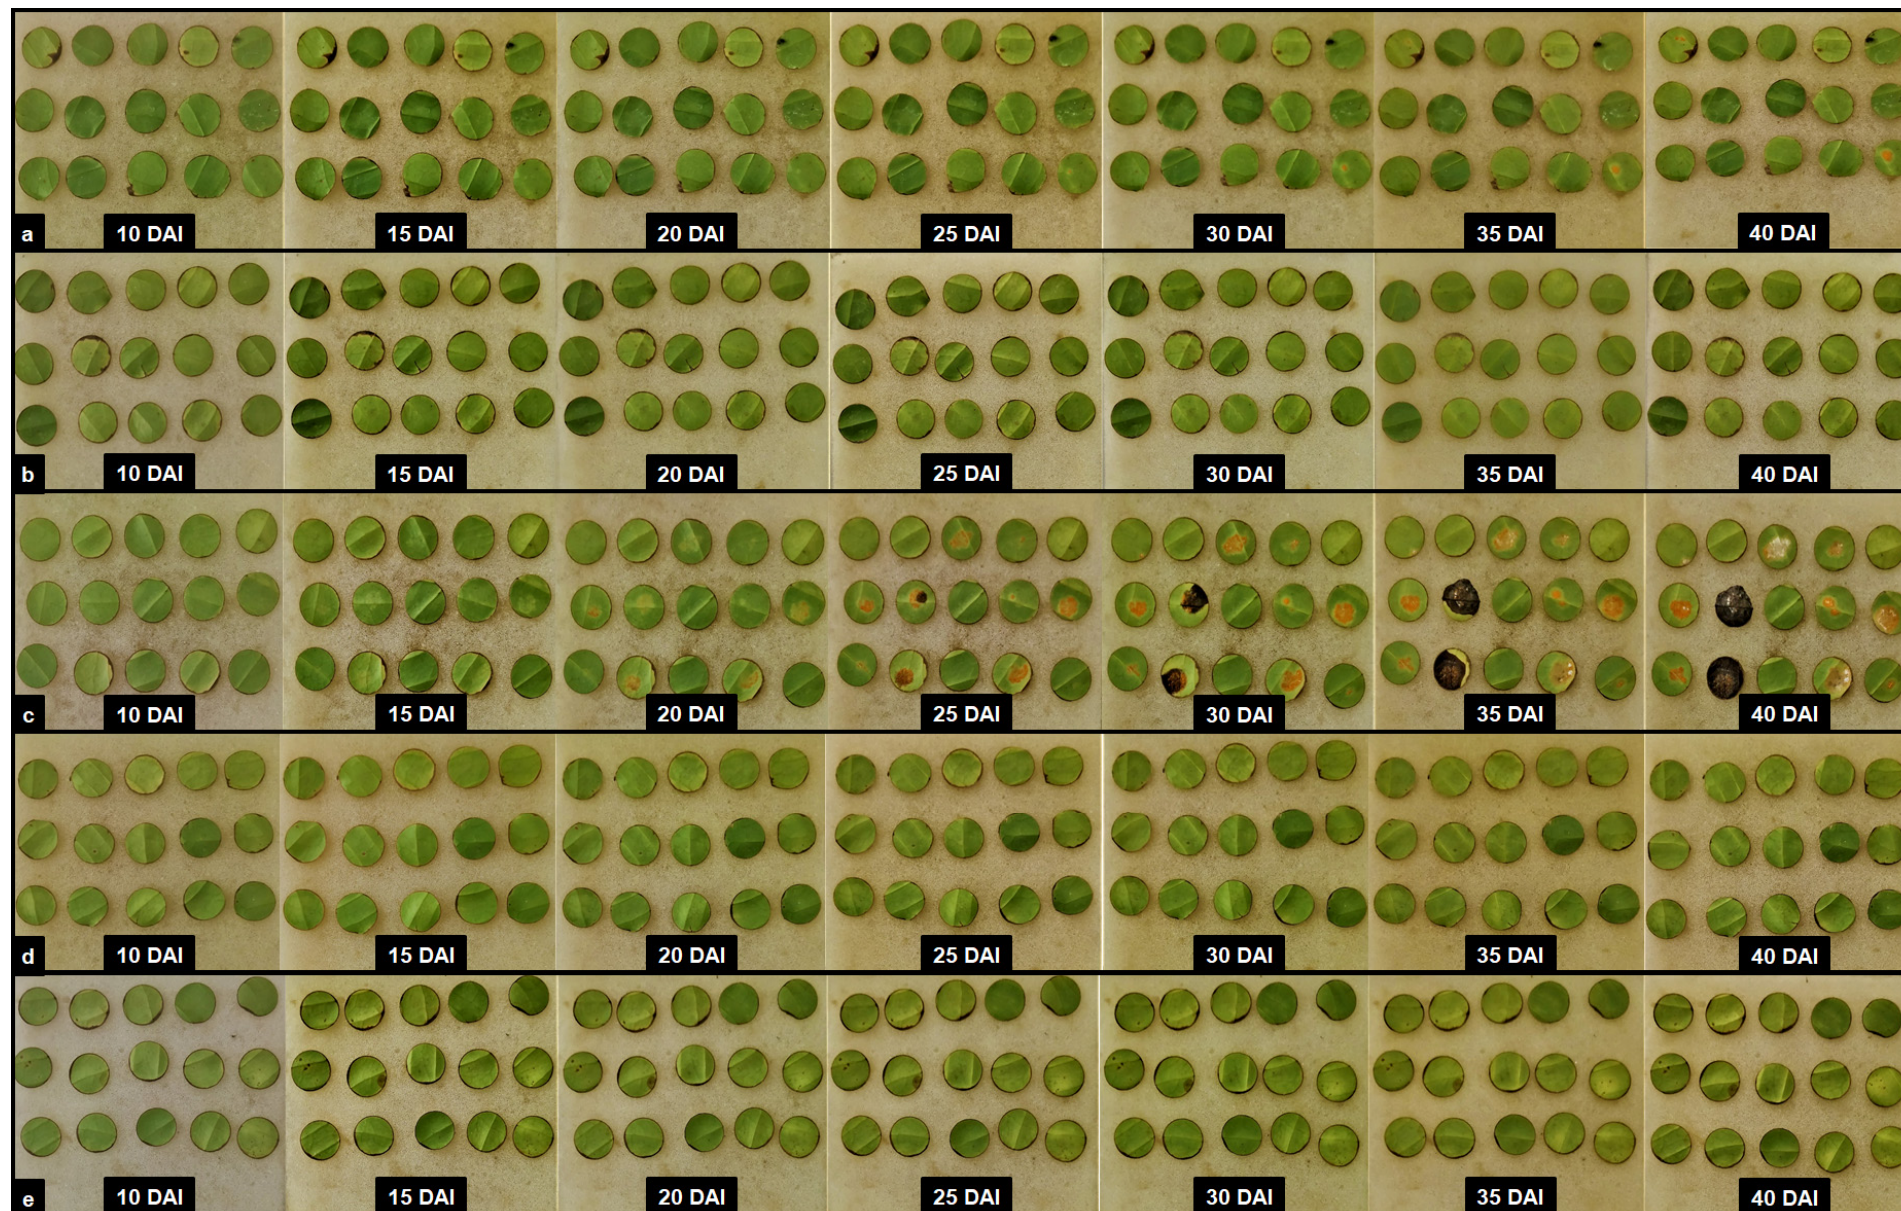

**Figure S2.** Representative images of *Hemileia vastatrix* disease progression in *Coffea arabica* cv. IPR 100 leaf discs at 10, 15, 20, 25, 30, 35, and 40 days after infection (DAI). The discs were treated with chitosan/sodium tripolyphosphate nanoparticles containing  $\text{Cu}^{2+}$  ions ( $\text{NPCu } 2.5 \text{ mmol L}^{-1}$ ) (a), ( $\text{NPCu } 5 \text{ mmol L}^{-1}$ ) (b),  $\text{Cu}^{2+}$  ions ( $\text{Cu } 1.25 \text{ mmol L}^{-1}$ ) (c), ( $\text{Cu } 2.5 \text{ mmol L}^{-1}$ ) (d), and ( $\text{Cu } 5 \text{ mmol L}^{-1}$ ) (e).



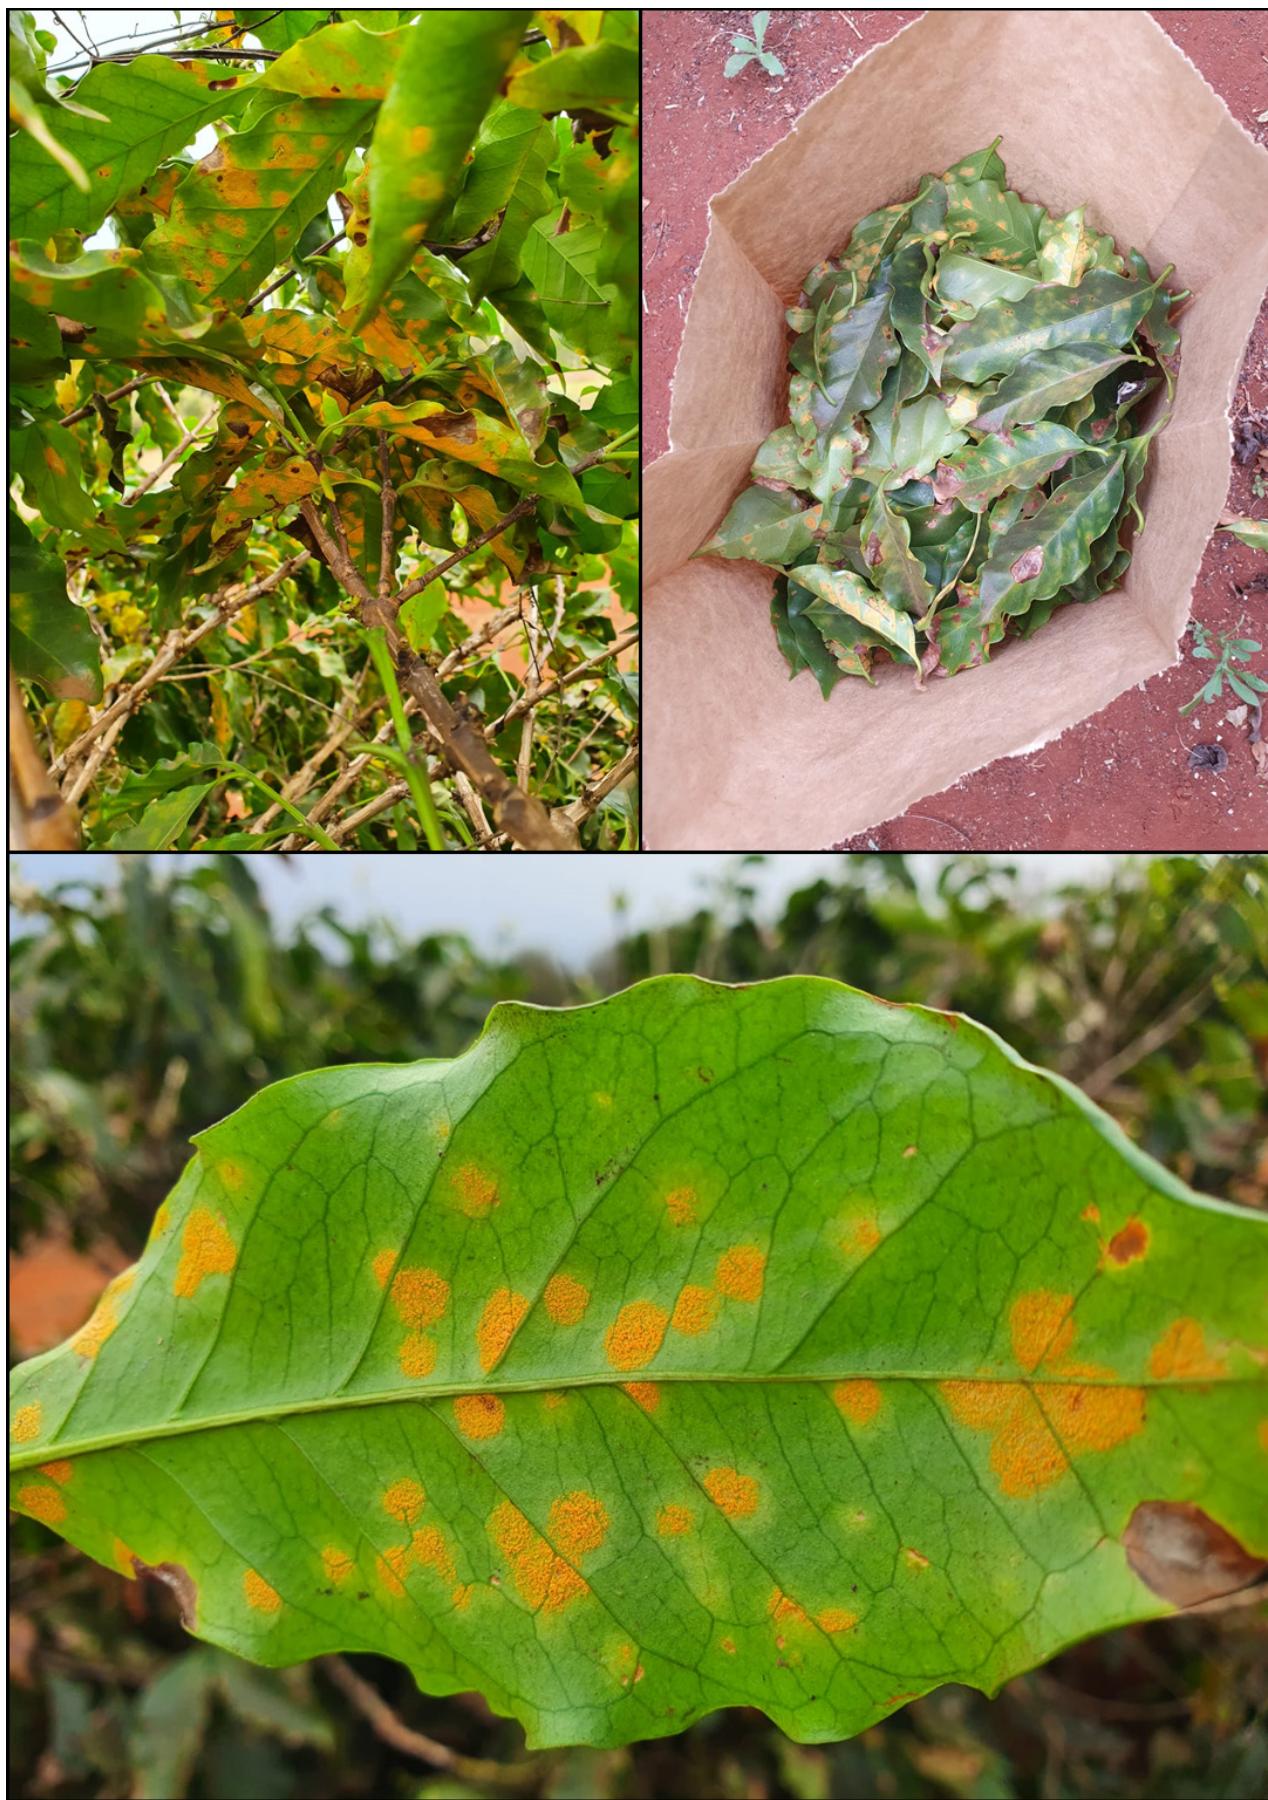

Figure S3. Field collection of coffee leaves containing urediniospores of *Hemileia vastatrix*.

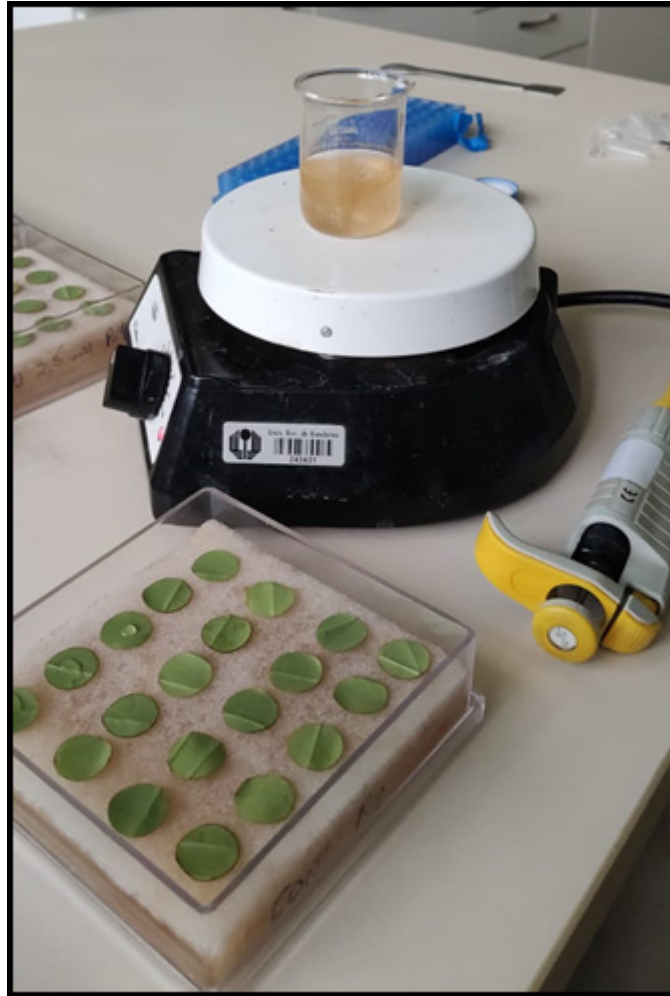

**Figure S4.** Suspension of viable *Hemileia vastatrix* urediniospores diluted in distilled water ( $1 \text{ mg mL}^{-1}$ ) and application of the inoculum on the abaxial face of *Coffea arabica* cv. IPR 100 leaf discs.
